# Supplementary material
Source: MDPI journal article supplement (https://www.mdpi.com/2311-7524/9/8/927)
Supplement: s1 [file s1]

**Supplemental files:**

**Table S1 Primer sequences for quantitative RT-PCR**

| Genes Name      | Genes ID        | Forward Primer (5' - 3') | Reverse Primer (5'- 3') | Remark          |
|-----------------|-----------------|--------------------------|-------------------------|-----------------|
| <i>*β-actin</i> | Cla97C02G026960 | CCATGTATGTTGCCATCCAG     | GGATAGCATGGGGTAGAGCA    | *Reference Gene |
| <i>CIOMT1</i>   | Cla97C02G028680 | TAAGACGGCTCACGGAAA       | CATCACTAACCTCGCATCAC    |                 |
| <i>CIOMT2</i>   | Cla97C02G030510 | GATGTGGGAGGAGGAAAT       | ATGTGGAAGGTCAAAGTTG     |                 |
| <i>CIOMT3</i>   | Cla97C02G030520 | GCAGCCAATCCATCACAC       | CTCCTCCAACATCCACCAA     |                 |
| <i>CIOMT4</i>   | Cla97C02G030540 | GATGTGGGAGGAGGAAAT       | ATGTGGAAGGTCAAAGTTG     |                 |
| <i>CIOMT5</i>   | Cla97C02G030550 | CAAGTAGCAGCAACAACA       | TCTCCAATGTCGCCTTTA      |                 |
| <i>CIOMT6</i>   | Cla97C02G030560 | GGCATAATCTTAGTGGAAGG     | AGCATTACAACCCAAACC      |                 |
| <i>CIOMT7</i>   | Cla97C02G030570 | CACCAATGTTGAGAATAGC      | CTCCATAAATCCTTCCCAT     |                 |
| <i>CIOMT8</i>   | Cla97C02G043200 | GCCTTGACATTTGGGATTTT     | GCGAGTGAGTGAACAGAG      |                 |
| <i>CIOMT9</i>   | Cla97C02G043210 | GCCTTGACATTTGGGATTTT     | GCGAGTGAGTGAACAGAG      |                 |
| <i>CIOMT10</i>  | Cla97C07G144540 | CAACAGAGCCTACGGAAT       | ATGGTAATGGTGCATGGT      |                 |
| <i>CIOMT11</i>  | Cla97C09G172390 | GAGGTGGTAATGGAACAT       | GAGGAAGGTCAATAACAAC     |                 |
| <i>CIOMT12</i>  | Cla97C10G188660 | ATTGGAGGAGGAGGTGTT       | GGGCATAGTGGTGTGATTT     |                 |
| <i>CIOMT13</i>  | Cla97C10G188670 | TTCGTAATCAAGATGGTGTC     | AACTCCTCCTTCAATAACTG    |                 |
| <i>CIOMT14</i>  | Cla97C10G195920 | CGTCGTTGGTTGATGTTG       | TGTTGAGGCTTCTGGTTAG     |                 |
| <i>CIOMT15</i>  | Cla97C10G195930 | GTGAAGTCTATGGTTGATGT     | AAGTGATGTGTGGGAATG      |                 |
| <i>CIOMT16</i>  | Cla97C10G202790 | GCATCATCAGGACGCACTTA     | GTTCCGCCGTTCTGCTCTAA    |                 |
| <i>CISNAT1</i>  | Cla97C04G072790 | CACTGAGACAACATTACCA      | GCCAACCTACCTTATCAC      |                 |
| <i>CISNAT2</i>  | Cla97C05G105300 | TATGGGATGTGGTGGTGGAT     | GGCTCCGAATACAATGCGATA   |                 |

**Table S2. Physical properties of translated proteins of genes**

| Gene Name      | Gene ID         | Chromosome Location                   | Protein length | pI   | Molecular Weight (KD) | Grand average of hydropathicity (GRAVY) | Description                             |
|----------------|-----------------|---------------------------------------|----------------|------|-----------------------|-----------------------------------------|-----------------------------------------|
| <i>CIOMT1</i>  | Cla97C02G028680 | Cla97Chr02:2161556 .. 2164053 (+)     | 1074           | 5.09 | 88. 81                | 0.700                                   | O-methyltransferase                     |
| <i>CIOMT2</i>  | Cla97C02G030510 | Cla97Chr02 : 3482833 .. 3484720 (-)   | 1065           | 5.09 | 88. 30                | 0.732                                   | O-methyltransferase, family 2           |
| <i>CIOMT3</i>  | Cla97C02G030520 | Cla97Chr02 : 3488829 .. 3491274 (-)   | 1071           | 5.11 | 87. 84                | 0.674                                   | O-methyltransferase, family 2           |
| <i>CIOMT4</i>  | Cla97C02G030540 | Cla97Chr02 : 3508413 .. 3510435 (+)   | 1068           | 5.09 | 88. 55                | 0.747                                   | O-methyltransferase, family 2           |
| <i>CIOMT5</i>  | Cla97C02G030550 | Cla97Chr02 : 3515980 .. 3518336 (+)   | 1017           | 5.10 | 83. 93                | 0.769                                   | O-methyltransferase, family 2           |
| <i>CIOMT6</i>  | Cla97C02G030560 | Cla97Chr02 : 3542077 .. 3543859 (+)   | 1080           | 5.13 | 88. 38                | 0.676                                   | O-methyltransferase, family 2           |
| <i>CIOMT7</i>  | Cla97C02G030570 | Cla97Chr02 : 3547673 .. 3554475 (+)   | 1023           | 5.07 | 86. 17                | 0.704                                   | O-methyltransferase, family 2           |
| <i>CIOMT8</i>  | Cla97C02G043200 | Cla97Chr02 : 31402942 .. 31404092 (-) | 1074           | 5.01 | 90. 50                | 0.905                                   | O-methyltransferase, family 2           |
| <i>CIOMT9</i>  | Cla97C02G043210 | Cla97Chr02 : 31427713 .. 31428863 (-) | 1074           | 5.01 | 90. 53                | 0.903                                   | O-methyltransferase, family 2           |
| <i>CIOMT10</i> | Cla97C07G144540 | Cla97Chr07 : 31874671 .. 31875744 (-) | 1074           | 5.03 | 88. 78                | 0.793                                   | caffeic acid<br>3-O-methyltransferase 1 |

|                |                     |                                          |      |      |        |       |                                            |
|----------------|---------------------|------------------------------------------|------|------|--------|-------|--------------------------------------------|
| <i>CIOMT11</i> | Cla97C09G<br>172390 | Cla97Chr09 : 8789656 ..<br>8791046 (+)   | 1092 | 5.08 | 90. 15 | 0.720 | O-methyltransferase                        |
| <i>CIOMT12</i> | Cla97C10G<br>188660 | Cla97Chr10 : 4750672 ..<br>4753331 (-)   | 897  | 5.10 | 73. 84 | 0.769 | caffeic acid<br>3-O-methyltransferase-like |
| <i>CIOMT13</i> | Cla97C10G<br>188670 | Cla97Chr10 : 4767376 ..<br>4770041 (-)   | 1113 | 5.06 | 92. 05 | 0.764 | caffeic acid<br>3-O-methyltransferase-like |
| <i>CIOMT14</i> | Cla97C10G<br>195920 | Cla97Chr10 : 25509231 ..<br>25511161 (-) | 1107 | 5.08 | 92. 02 | 0.750 | O-methyltransferase                        |
| <i>CIOMT15</i> | Cla97C10G<br>195930 | Cla97Chr10 : 25518757 ..<br>25520719 (-) | 1098 | 5.08 | 90. 92 | 0.752 | O-methyltransferase                        |
| <i>CIOMT16</i> | Cla97C10G<br>202790 | Cla97Chr10 : 32622705 ..<br>32628072 (+) | 1113 | 5.01 | 91. 81 | 0.855 | O-methyltransferase                        |
| <i>CISNAT1</i> | Cla97C04G<br>072790 | Cla97Chr04 : 20117108 ..<br>20120860 (-) | 744  | 5.14 | 61. 86 | 0.743 | N-acetyltransferase, putative              |
| <i>CISNAT2</i> | Cla97C05G<br>105300 | Cla97Chr05 : 32943340 ..<br>32943915 (+) | 576  | 5.12 | 48. 59 | 0.861 | N-acetyltransferase, putative              |

---

**Table S3. Prediction of cis-acting regulatory elements of *CIOMT* and *CISNAT* genes**

| Gene           | anaerobic<br>induction<br>(ARE) | light<br>responsi<br>veness<br>(G-box) | low<br>temperature<br>stress<br>responsiven<br>ess (LTR) | drought<br>responsiveness<br>(MBS) | stress<br>responsiveness | defense and stress<br>responsiveness<br>(TC-rich repeats) | methyl<br>jasmonate-respo<br>nsiveness<br>(TGACG-motif) | abscisic<br>responsiveness<br>(ABRE) | acid | salicylic<br>responsiveness<br>(TCA-element) | acid |
|----------------|---------------------------------|----------------------------------------|----------------------------------------------------------|------------------------------------|--------------------------|-----------------------------------------------------------|---------------------------------------------------------|--------------------------------------|------|----------------------------------------------|------|
| <i>CIOMT1</i>  | ✓                               | ✓                                      | ✓                                                        | ✓                                  |                          | ✓                                                         | ✓                                                       | ✓                                    |      |                                              |      |
| <i>CIOMT2</i>  | ✓                               | ✓                                      |                                                          | ✓                                  |                          |                                                           | ✓                                                       | ✓                                    |      |                                              |      |
| <i>CIOMT3</i>  | ✓                               | ✓                                      |                                                          |                                    |                          | ✓                                                         | ✓                                                       | ✓                                    |      |                                              |      |
| <i>CIOMT4</i>  | ✓                               | ✓                                      |                                                          | ✓                                  |                          |                                                           |                                                         | ✓                                    |      | ✓                                            |      |
| <i>CIOMT5</i>  | ✓                               | ✓                                      |                                                          | ✓                                  |                          | ✓                                                         | ✓                                                       | ✓                                    |      |                                              |      |
| <i>CIOMT6</i>  | ✓                               | ✓                                      |                                                          |                                    |                          | ✓                                                         | ✓                                                       | ✓                                    |      | ✓                                            |      |
| <i>CIOMT7</i>  | ✓                               | ✓                                      | ✓                                                        |                                    |                          |                                                           | ✓                                                       |                                      |      | ✓                                            |      |
| <i>CIOMT8</i>  | ✓                               | ✓                                      | ✓                                                        |                                    |                          |                                                           | ✓                                                       | ✓                                    |      | ✓                                            |      |
| <i>CIOMT9</i>  | ✓                               | ✓                                      | ✓                                                        |                                    |                          |                                                           | ✓                                                       | ✓                                    |      | ✓                                            |      |
| <i>CIOMT10</i> | ✓                               | ✓                                      | ✓                                                        |                                    |                          | ✓                                                         |                                                         | ✓                                    |      | ✓                                            |      |
| <i>CIOMT11</i> | ✓                               | ✓                                      |                                                          | ✓                                  |                          | ✓                                                         |                                                         | ✓                                    |      | ✓                                            |      |
| <i>CIOMT12</i> | ✓                               | ✓                                      |                                                          | ✓                                  |                          |                                                           |                                                         |                                      |      |                                              |      |
| <i>CIOMT13</i> | ✓                               | ✓                                      |                                                          |                                    |                          |                                                           | ✓                                                       | ✓                                    |      |                                              |      |
| <i>CIOMT14</i> | ✓                               | ✓                                      | ✓                                                        |                                    |                          |                                                           |                                                         | ✓                                    |      |                                              |      |
| <i>CIOMT15</i> | ✓                               | ✓                                      | ✓                                                        |                                    |                          | ✓                                                         |                                                         | ✓                                    |      |                                              |      |
| <i>CIOMT16</i> | ✓                               | ✓                                      |                                                          |                                    |                          | ✓                                                         | ✓                                                       | ✓                                    |      |                                              |      |
| <i>CISNAT1</i> | ✓                               | ✓                                      |                                                          | ✓                                  |                          |                                                           | ✓                                                       | ✓                                    |      | ✓                                            |      |
| <i>CISNAT2</i> | ✓                               | ✓                                      | ✓                                                        |                                    |                          |                                                           |                                                         |                                      |      |                                              |      |

**Table S4. The similarities of *CIOMTs* to *COMT* genes from other plants**

|                | <i>AtCOMT</i> | <i>SlCOMT</i> | <i>OsCOMT</i> |
|----------------|---------------|---------------|---------------|
| <i>CIOMT1</i>  | 33%           | 33%           | 32%           |
| <i>CIOMT2</i>  | 37%           | 41%           | 38%           |
| <i>CIOMT3</i>  | 34%           | 37%           | 34%           |
| <i>CIOMT4</i>  | 36%           | 39%           | 36%           |
| <i>CIOMT5</i>  | 33%           | 36%           | 32%           |
| <i>CIOMT6</i>  | 34%           | 36%           | 31%           |
| <i>CIOMT7</i>  | 32%           | 31%           | 32%           |
| <i>CIOMT8</i>  | 40%           | 40%           | 37%           |
| <i>CIOMT9</i>  | 40%           | 40%           | 37%           |
| <i>CIOMT10</i> | 75%           | 74%           | 60%           |
| <i>CIOMT11</i> | 33%           | 34%           | 29%           |
| <i>CIOMT12</i> | 50%           | 52%           | 46%           |
| <i>CIOMT13</i> | 55%           | 57%           | 51%           |
| <i>CIOMT14</i> | 32%           | 33%           | 29%           |
| <i>CIOMT15</i> | 27%           | 28%           | 28%           |
| <i>CIOMT16</i> | 38%           | 37%           | 36%           |
